# Supplementary material
Source: MDPI journal article supplement (https://www.mdpi.com/2071-1050/16/8/3467)
Supplement: s1 [file s1]

**Table S1.** Quantification of the risk of soil erosion.

| Micro watersheds | Br   | Dd   | Sf   | Dt   | Lof  | Tsl  | CCm  | Ff   | Cr   | Er   |
|------------------|------|------|------|------|------|------|------|------|------|------|
| 2A2B5k           | 13   | 0.67 | 0.71 | 1.2  | 0.75 | 50.6 | 1.45 | 0.43 | 0.48 | 0.74 |
| 2A2B5b           | 15.5 | 0.38 | 0.76 | 0.86 | 1.31 | 16.6 | 1.64 | 1.07 | 0.37 | 1.17 |
| 2A2B5j           | 19.5 | 0.98 | 1.86 | 1.71 | 0.51 | 21.6 | 1.44 | 0.9  | 0.49 | 1.07 |
| 2A2B5h           | 22   | 0.39 | 0.53 | 0.55 | 1.28 | 17   | 1.79 | 1.25 | 0.31 | 1.26 |
| 2A2B5m           | 7    | 1.85 | 0.55 | 0.56 | 0.27 | 20.8 | 1.48 | 0.09 | 0.47 | 0.33 |

Br: bifurcation ratio, Dd: drainage density, Sf: stream frequency, Lof: length of overland flow, Tsl: total stream length, CCm: constant of channel maintenance, Ff: form factor, Cr: Circularity ratio, Er: elongation ratio

**Table S2.** Quantification of the Ground water Recharge risk

| Micro watersheds | Lof  | CC  | Sf   | CCm  | Dd   | Dt   | Br   | Ff   | Er   | Cr   | Rn   | Br  | Rr    |
|------------------|------|-----|------|------|------|------|------|------|------|------|------|-----|-------|
| 2A2B5k           | 0.75 | 1.5 | 0.71 | 1.5  | 0.67 | 1.2  | 13   | 0.43 | 0.74 | 0.48 | 0.22 | 336 | 25.32 |
| 2A2B5b           | 1.31 | 1.6 | 0.76 | 2.62 | 0.38 | 0.86 | 15.5 | 1.07 | 1.17 | 0.37 | 0.13 | 342 | 53.67 |
| 2A2B5j           | 0.51 | 1.4 | 1.86 | 1.02 | 0.98 | 1.71 | 19.5 | 0.9  | 1.07 | 0.49 | 0.34 | 345 | 69.83 |
| 2A2B5h           | 1.28 | 1.8 | 0.53 | 2.56 | 0.39 | 0.55 | 22   | 1.25 | 1.26 | 0.31 | 0.15 | 372 | 62.92 |
| 2A2B5m           | 0.27 | 1.5 | 0.55 | 0.54 | 1.85 | 0.56 | 7    | 0.09 | 0.33 | 0.47 | 0.57 | 309 | 17.43 |

Lof: length of overland flow, CC: compactness coefficient, Sf: stream frequency, CCm: constant of channel maintenance, Dd: drainage density, Dt: drainage texture, Br: bifurcation ratio, Ff: form factor, Cr: Circularity ratio, Er: elongation ratio, Rn: ruggedness number, Br: basin relief, Rr: relief ratio

**Table S3.** Quantification of the Hydro Geomorphological risk

| Area in Km <sup>2</sup> |       |       |       |       |       |       |       |       |       |      |       |  |
|-------------------------|-------|-------|-------|-------|-------|-------|-------|-------|-------|------|-------|--|
| Micro watersheds        | I     | Pt    | Pn    | Pb    | Rh    | MDh   | Vf    | W     | P     | R    | HDh   |  |
| 2A2B5k                  | 0.042 | 22.49 | 11.38 | 0.056 | 0.294 | 37.29 | 2.492 | 0.081 | -     | -    | -     |  |
| 2A2B5b                  | -     | 7.73  | 29.29 | 0.52  | -     | 1.35  | 3.3   | 0.42  | -     | -    | -     |  |
| 2A2B5j                  | -     | 6.2   | 11.91 | 0.14  | 0.5   | 0.53  | 2.1   | 0.14  | 0.19  | 0.4  | -     |  |
| 2A2B5h                  | -     | 10.5  | 20.69 | 0.42  | 0.07  | 0.05  | 3.39  | 0.26  | 0.399 | 0.95 | 0.054 |  |
| 2A2B5m                  | 0.42  | 46.92 | 73.43 | 1.15  | 0.87  | 69.94 | 11.4  | 0.91  | 0.86  | 3.35 | 3.06  |  |

**Table S4.** Percentage of the total area of the Hydro Geomorphological risk

| Area in percentage |      |       |       |       |       |       |       |       |       |       |       |
|--------------------|------|-------|-------|-------|-------|-------|-------|-------|-------|-------|-------|
| Micro watersheds   | I    | Pt    | Pn    | Pb    | Rh    | MDh   | Vf    | W     | P     | R     | HDh   |
| 2A2B5k             | 9.1  | 23.97 | 7.76  | 2.45  | 17.02 | 34.16 | 10.99 | 4.5   | -     | -     | -     |
| 2A2B5b             | -    | 8.24  | 19.97 | 22.75 | 0     | 1.24  | 14.55 | 23.18 | -     | -     | -     |
| 2A2B5j             | -    | 6.61  | 8.12  | 6.12  | 28.9  | 0.49  | 9.26  | 7.73  | 13.11 | 8.51  | 0     |
| 2A2B5h             | -    | 11.19 | 14.1  | 18.37 | 4.05  | 0.05  | 14.95 | 14.35 | 27.54 | 20.21 | 1.73  |
| 2A2B5m             | 90.9 | 50    | 50.05 | 50.31 | 50.29 | 64.07 | 50.26 | 50.23 | 59.35 | 71.28 | 98.27 |

I: inselberg, Pt: pediment, Pn: pediplain, Pb: point bar, Rh: residual hill, MDh: moderately dissected hills, Vf: valley fills, W: waterbody, P: pond, R: river, HDh: highly dissected hills

**Table S5.** Quantification of the Lithological risk

| Area in square-km |      |       |           |      |       |       |      |
|-------------------|------|-------|-----------|------|-------|-------|------|
| Micro watersheds  | BG   | GG    | HS, A, MU | P    | MS    | CG, G | Gss  |
| 2A2B5k            | 7.75 | 64.14 | 3.82      | 0.13 |       | -     |      |
| 2A2B5b            | -    | 31.21 | 0.13      | -    | 12.12 | -     |      |
| 2A2B5j            | -    | 19.59 | 0.13      | 0.13 | 2.13  | 0.09  |      |
| 2A2B5h            | -    | 30.07 | 0.5       | -    | 3.61  | 7.24  | 2.24 |
| 2A2B5m            | 0.6  | 24.88 | 1.81      | -    | -     | -     | -    |

**Table S6.** Percentage of the total area of the Lithological risk.

| Micro watersheds | BG    | GG    | HS, A, MU | P     | MS    | CG, G | Gss |
|------------------|-------|-------|-----------|-------|-------|-------|-----|
| 2A2B5k           | 92.81 | 37.76 | 59.76     | 49.18 | -     | -     | -   |
| 2A2B5b           | -     | 18.37 | 2.03      | -     | 67.86 | -     | -   |
| 2A2B5j           | -     | 11.53 | 2.08      | 50.82 | 11.93 | 1.23  | -   |
| 2A2B5h           | -     | 17.7  | 7.82      | -     | 20.21 | 98.77 | 100 |
| 2A2B5m           | 7.19  | 14.64 | 28.31     | -     | -     | -     | -   |

BG: biotite gneiss, GG: granite gneiss, HS: hornblende schist, A: amphibolite, Mu: meta ultrabasite, P: pegmatite, MS: mica schist, CG: calc gneiss, G: granulite, Gss: graphite silimate schist

**Table S7.** Quantification of the Land Use Land Cover risk.

| Area in $Km^2$   |       |      |      |       |       |       |       |      |       |       |
|------------------|-------|------|------|-------|-------|-------|-------|------|-------|-------|
| Micro watersheds | Ag    | S    | W    | Lu    | Sh    | Pl    | AgF   | R    | Df    | Bl    |
| 2A2B5k           | 12.05 | 0.02 | 0.41 | 35.78 | 3.55  | 2.31  | 7.07  | 0.24 | 26.33 | 12.26 |
| 2A2B5b           | 39.88 | 2.68 | 0.07 | 4.04  | 8.28  | 12.04 | 14.6  | 0.65 | 2.91  | 0.23  |
| 2A2B5j           | 36.55 | 1.49 | 0.41 | 8.16  | 14.15 | 10.82 | 11.67 | 0.63 | 2.93  | 13.2  |
| 2A2B5h           | 31.84 | 1.15 | 0.53 | 7.93  | 16.4  | 15.02 | 11    | 0.78 | 10.15 | 5.19  |
| 2A2B5m           | 0     | 0.04 | 0.07 | 43.21 | 1.26  | 0.31  | 0.07  | 0.01 | 48.76 | 6.28  |

**Table S8.** percentage of the total area of the Land use Land Cover risk.

| Area in percentage |       |       |      |       |       |       |       |       |       |       |
|--------------------|-------|-------|------|-------|-------|-------|-------|-------|-------|-------|
| Micro watersheds   | Ag    | S     | W    | Lu    | Sh    | Pl    | AgF   | R     | Df    | Bl    |
| 2A2B5k             | 10.01 | 0.37  | 27.4 | 36.11 | 8.13  | 5.71  | 15.91 | 10.24 | 28.91 | 32.98 |
| 2A2B5b             | 33.14 | 49.82 | 4.52 | 4.07  | 18.98 | 29.73 | 32.87 | 27.96 | 3.19  | 0.62  |
| 2A2B5j             | 30.38 | 27.69 | 27.4 | 8.23  | 32.43 | 26.71 | 26.28 | 27.31 | 3.22  | 35.53 |
| 2A2B5h             | 26.47 | 21.39 | 35.7 | 8     | 37.59 | 37.1  | 24.77 | 33.81 | 11.15 | 13.97 |
| 2A2B5m             | 0     | 0.68  | 4.93 | 43.6  | 2.88  | 0.77  | 0.16  | 0.47  | 53.54 | 16.89 |

Ag: agricultural land, S: settlement, W: waterbody, Lu: lateritic upland, Sh: shrubs, Pl: plantation, AgF: agricultural fallow, R: river, Df: dense forest, Bl: barren land.

**Table S9.** Assessing the consistency ratio (CR) for the various thematic risk parameters.

| Themes                | Priority | Weighted Sum Ratio | $\lambda_{max}$ | Consistency Index (CI) | Consistency ratio (CR) |
|-----------------------|----------|--------------------|-----------------|------------------------|------------------------|
| Soil Erosion          | 0.29     | 1.4112             | 4.866207        | 0.0047                 | 0.00422                |
| Ground Water Recharge | 0.22     | 1.097              | 4.986364        |                        |                        |
| LULC                  | 0.22     | 1.097              | 4.986364        |                        |                        |
| Hydro Geomorphology   | 0.16     | 0.7813             | 4.883125        |                        |                        |
| Lithology             | 0.09     | 0.4665             | 5.183333        |                        |                        |

**Table S10.** The Normalized Matrix

| Micro watersheds (L <sub>m</sub> ) | The Normalized values to the Criteria $r_{ij}$ |                        |       |                     |           |
|------------------------------------|------------------------------------------------|------------------------|-------|---------------------|-----------|
|                                    | Soil Erosion                                   | Ground Water Re-charge | LULC  | Hydro Geomorphology | Lithology |
| 2A2B5k (L <sub>1</sub> )           | 0.057                                          | 0.060                  | 0.048 | 0.052               | 0.073     |
| 2A2B5b (L <sub>2</sub> )           | 0.075                                          | 0.050                  | 0.118 | 0.088               | 0.052     |
| 2A2B5j (L <sub>3</sub> )           | 0.057                                          | 0.083                  | 0.083 | 0.050               | 0.052     |
| 2A2B5h (L <sub>4</sub> )           | 0.079                                          | 0.066                  | 0.058 | 0.084               | 0.069     |
| 2A2B5m (L <sub>5</sub> )           | 0.066                                          | 0.065                  | 0.075 | 0.089               | 0.078     |

**Table S11.** The weighted Normalized Matrix.

| Alternatives<br>(L <sub>m</sub> ) | Weighted Normalized values of the criteria V <sub>ij</sub> |                            |       |                        |           |
|-----------------------------------|------------------------------------------------------------|----------------------------|-------|------------------------|-----------|
|                                   | Soil Ero-<br>sion                                          | Ground Water Re-<br>charge | LULC  | Hydro<br>Geomorphology | Lithology |
| 2A2B5k (L <sub>1</sub> )          | 0.016                                                      | 0.013                      | 0.011 | 0.008                  | 0.007     |
| 2A2B5b (L <sub>2</sub> )          | 0.022                                                      | 0.011                      | 0.026 | 0.014                  | 0.005     |
| 2A2B5j (L <sub>3</sub> )          | 0.016                                                      | 0.018                      | 0.018 | 0.008                  | 0.005     |
| 2A2B5h (L <sub>4</sub> )          | 0.023                                                      | 0.015                      | 0.013 | 0.013                  | 0.006     |
| 2A2B5m (L <sub>5</sub> )          | 0.019                                                      | 0.014                      | 0.016 | 0.014                  | 0.007     |
